# Supplementary material for: Fiorinia proboscidaria Green, an Armored Scale Insect New to the Hawaiian Fauna (Homoptera: Diaspididae)
Source: PLOS journal article supplement (doi:10.1371/journal.pone.0173999), 2001-04-01
Supplement: S3 (10.1371/journal.pone.0173999.s003) [file journal.pone.0173999.s003]

| Turtle ID       | Capture date | Measured SCL (cm) | Estimated SCL (cm) | Back-calculated growth rate (cm/month) | Estimated growth between LAG deposition and tagging (cm) | Estimated + adjusted (cm) | Difference: Measured - Estimated (cm)   | Difference: Measured - Estimated + adjusted (cm)    |
|-----------------|--------------|-------------------|--------------------|----------------------------------------|----------------------------------------------------------|---------------------------|-----------------------------------------|-----------------------------------------------------|
| Lk ACC020422-02 | 10/10/1999   | 31.2              | 31.9               | *                                      | *                                                        | 31.9                      | 0.7                                     | 0.7                                                 |
| Lk DMD010708-01 | 6/11/2001    | 31.2              | 29.3               | 1                                      | 2                                                        | 31.3                      | 1.9                                     | 0.1                                                 |
| Lk BG990404-01  | 6/21/1998    | 32.5              | 30.6               | 1                                      | 2                                                        | 32.6                      | 1.9                                     | 0.1                                                 |
| Lk AFA070427-03 | 5/8/2005     | 64.2              | 65.2               | 0                                      | 0                                                        | 65.2                      | 1                                       | 1                                                   |
| Lk AFA080516-01 | 6/23/2007    | 68.7              | 69                 | 0                                      | 0                                                        | 69                        | 0.3                                     | 0.3                                                 |
|                 |              |                   |                    |                                        |                                                          |                           | <i>Paired t-test</i><br><i>p = 0.60</i> | <i>Wilcoxon Signed Rank Test</i><br><i>p = 1.00</i> |

\*Adjustment not available; prior growth rate could not be calculated because LAG resorbed
